# Supplementary material for: Functional and quality of life outcomes of localised prostate cancer treatments (Prostate Testing for Cancer and Treatment [ProtecT] study)
Source: PubMed Central journal article supplement (PMC9543725; doi:10.1111/bju.15739), 2022-05-03
Supplement: BJU-130-370-s001.pdf [file BJU-130-370-s001.pdf]

## ProtecT Supplementary Online Content

### Table of contents:

|                                                                                                                                                                                                         |    |
|---------------------------------------------------------------------------------------------------------------------------------------------------------------------------------------------------------|----|
| <i>Figure S1.</i> Primary and secondary treatments for localized prostate cancer received over 6 years of follow up .....                                                                               | 2  |
| <i>Figure S2.</i> Adjusted physical and mental health and psychological outcomes after primary treatments for prostate cancer over 6 years .....                                                        | 3  |
| <i>Figure S3.</i> Patient-reported urinary, bowel and sexual symptoms after radical treatment for localised prostate cancer, either initially, or after a period of active monitoring over 4 years..... | 4  |
| <i>Figure S4.</i> Adjusted quality of life outcomes after receiving radical treatment after primary active monitoring over 4 years.....                                                                 | 5  |
| <i>Figure S5.</i> Patient-reported urinary, bowel and sexual symptoms by age groups by primary localised prostate cancer treatments over 6 years.....                                                   | 6  |
| <i>Table S1.</i> Response rates for exemplar PROMs in the treatment received analysis.....                                                                                                              | 7  |
| <i>Table S2.</i> Adjusted urinary symptoms corresponding to Figure 1 and subscales .....                                                                                                                | 8  |
| <i>Table S3.</i> Adjusted sexual symptoms corresponding to Figure 2 and subscales.....                                                                                                                  | 10 |
| <i>Table S4.</i> Adjusted bowel symptoms corresponding to Figure 3 and subscales.....                                                                                                                   | 11 |
| <i>Table S5.</i> Adjusted symptoms from immediate radical treatments or after active monitoring corresponding to Figure S3.....                                                                         | 13 |
| <i>Table S6.</i> Adjusted quality of life items by treatment received corresponding to Figure S2.....                                                                                                   | 14 |
| <i>Table S7.</i> Adjusted quality of life of radical treatments after active monitoring and immediate: radical treatment corresponding to Figure S4 .....                                               | 15 |
| <i>Table S8.</i> Adjusted interaction between treatment and age group on symptoms corresponding to Supplementary Figure S5.....                                                                         | 16 |
| <i>Table S9.</i> Adjusted symptoms and quality five years after enrolment in the CEASAR cohort or diagnosis in the ProtecT trial .....                                                                  | 17 |

**Figure S1. Primary and secondary treatments for localized prostate cancer received over 6 years of follow up**

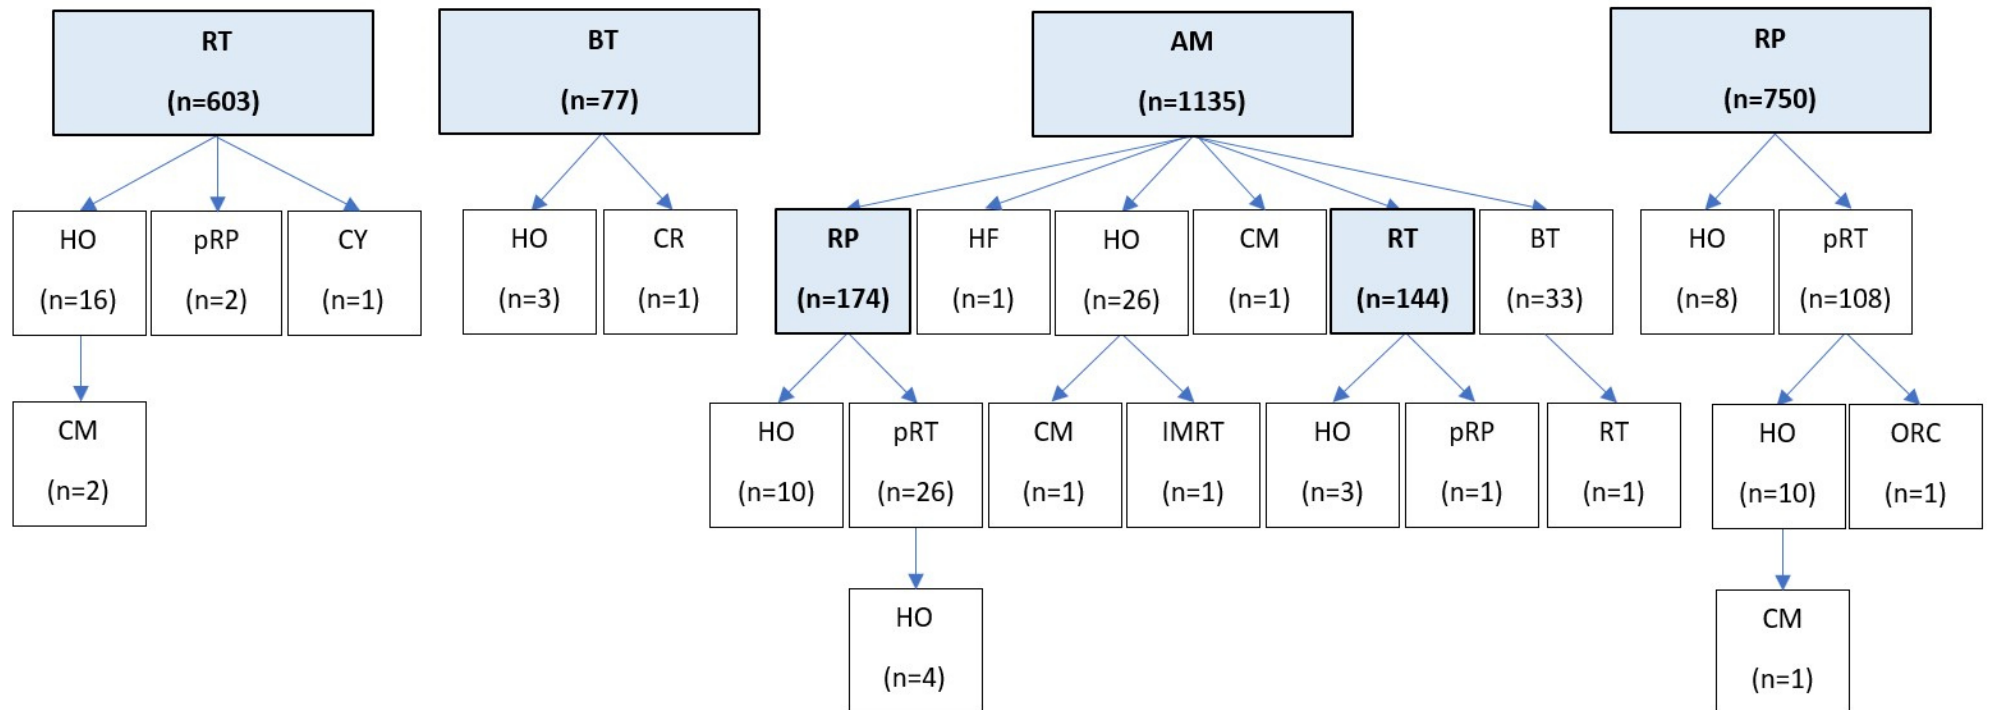

Abbreviations: RT=radiation, BT=brachytherapy, RP=radical prostatectomy, AM=active monitoring, HO=hormones, pRT=post-surgery radiotherapy, pRP=post-radiotherapy surgery, CM=chemotherapy, HF=HIFU, IMRT=intensity-modulated radiation therapy, ORC=subcapsular orchidectomy + CPA, CY=cystoprostatectomy (for bladder cancer), CR=cryotherapy. Groups highlighted in blue analysed with others until they received a new treatment.

**Figure S2. Adjusted physical and mental health and psychological outcomes after primary treatments for prostate cancer over 6 years**

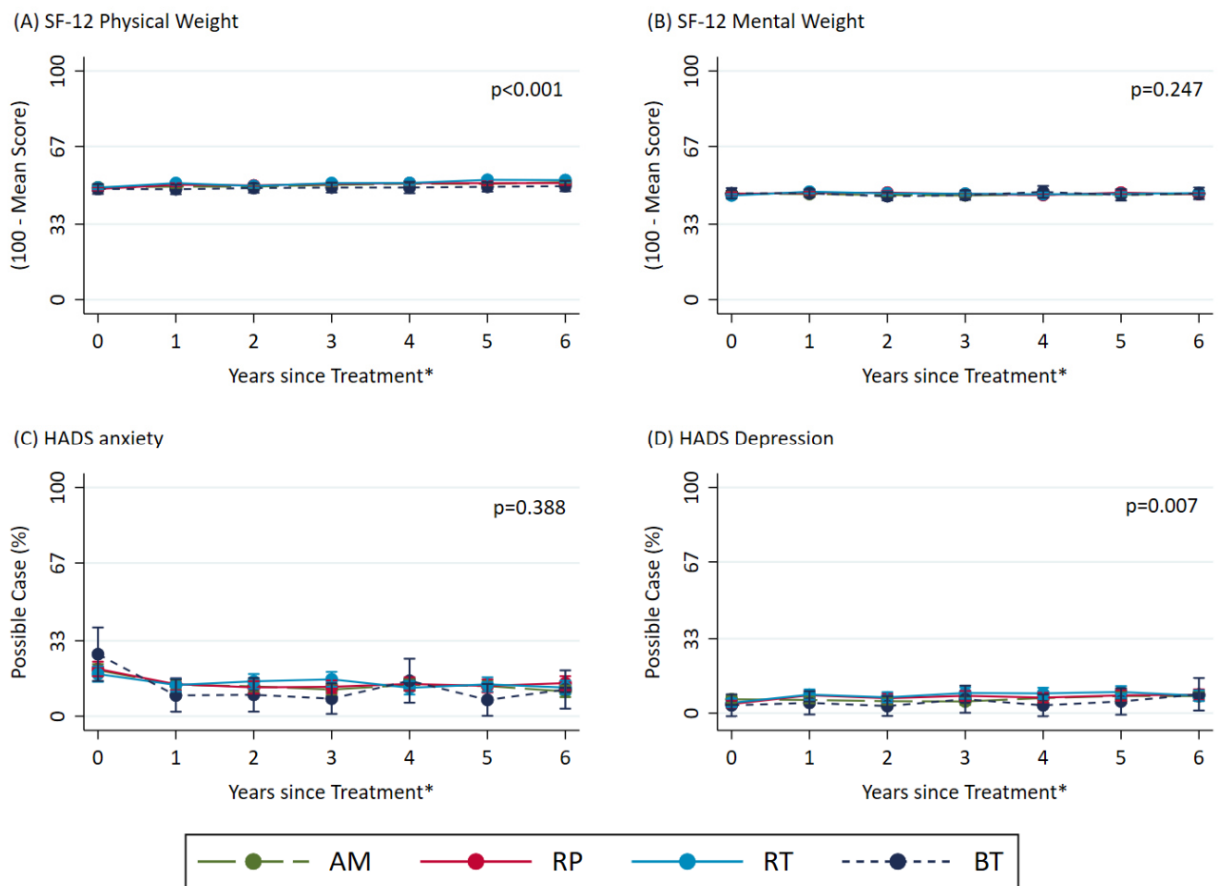

Abbreviations: AM, active monitoring, RP, radical prostatectomy, RT, radiation, BT brachytherapy.  
 \*Time from treatment is the time between diagnosis and start of radical treatment or radical treatment after active monitoring and defined as questionnaires completed for e.g. year 2 as between 1 and 2 years after treatment. Higher scores or percentages indicate worse symptoms with SF-12 symptoms reversed.

**Figure S3. Patient-reported urinary, bowel and sexual symptoms after radical treatment for localised prostate cancer, either initially, or after a period of active monitoring over 4 years**

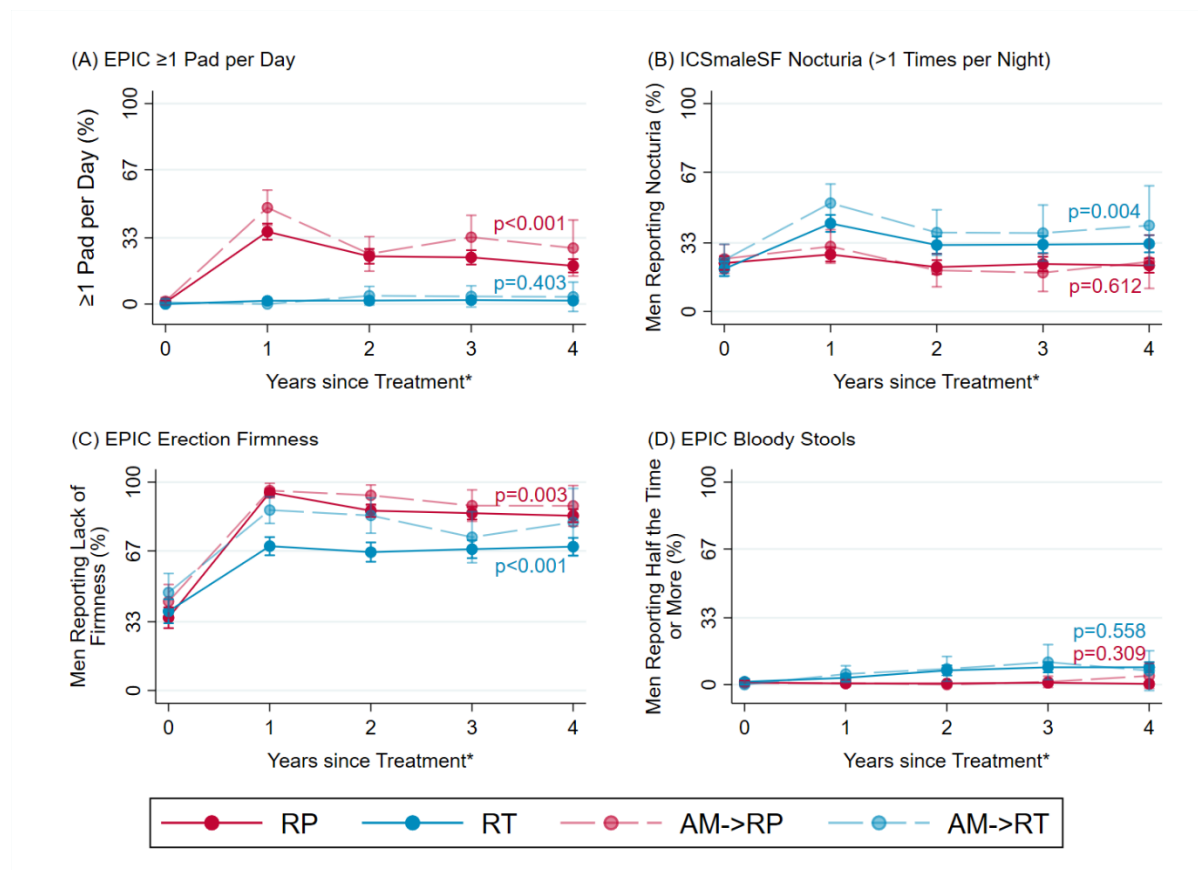

Abbreviations: AM, active monitoring; RP, radical prostatectomy; RT, EBRT. \*Time from treatment is between diagnosis and radical treatment or radical treatment after active monitoring and for questionnaires completed for e.g. year 2 as between 1 and 2 years after treatment. Higher scores or percentages indicate worse symptoms. Points are estimated means from models with error bars representing 95% CIs. P-value based on likelihood ratio test in blue (EBRT) or red (RP) comparing symptoms between those men starting treatment within a year of diagnosis with those delaying it until at least a year after diagnosis after receiving active monitoring.

**Figure S4. Adjusted quality of life outcomes after receiving radical treatment after primary active monitoring over 4 years**

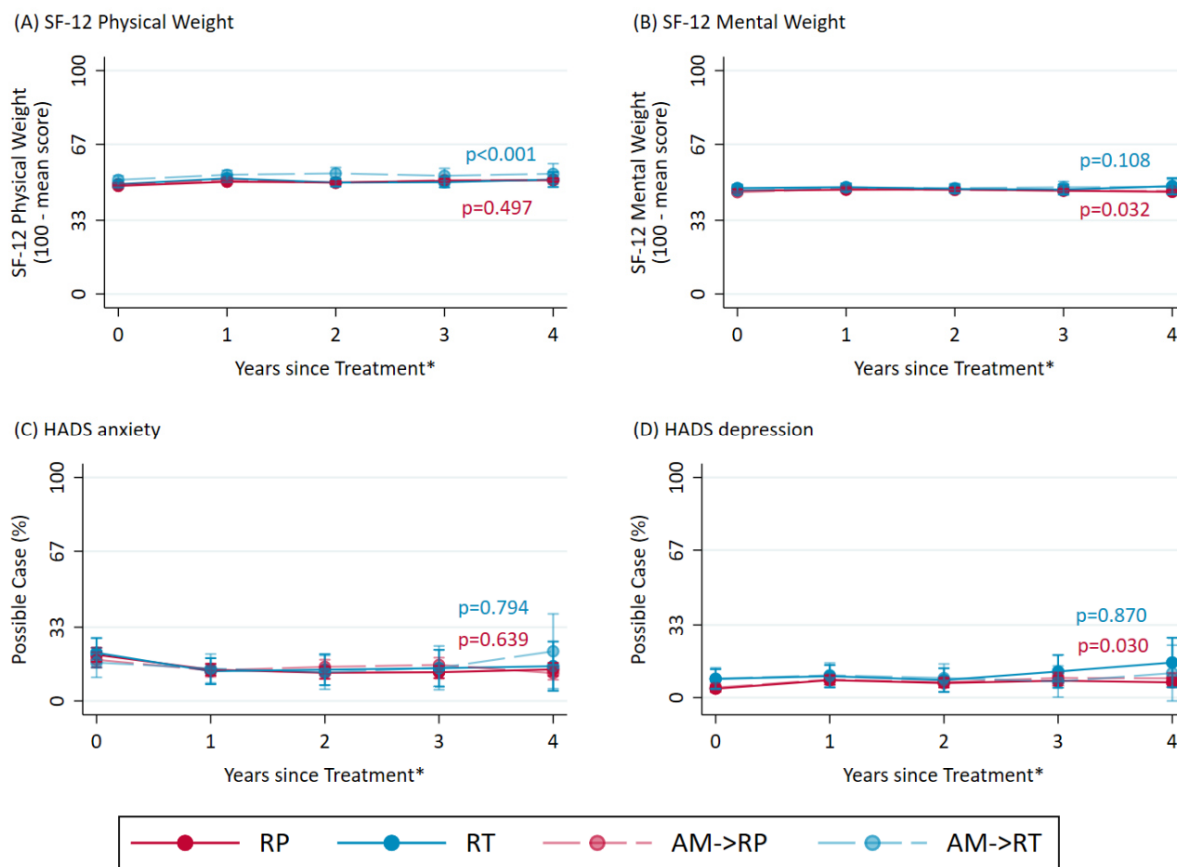

Abbreviations: AM, active monitoring, RP, radical prostatectomy, RT, radiation, BT brachytherapy.  
 \*Time from treatment is the time between diagnosis and start of radical treatment or radical treatment after active monitoring and defined as questionnaires completed for e.g. year 2 as between 1 and 2 years after treatment. Higher scores or percentages indicate worse symptoms with SF-12 symptoms reversed. P-value based on likelihood ratio test in blue (radiation) or red (radical prostatectomy) comparing symptoms between those men starting treatment within a year of diagnosis with those delaying it until at least a year after diagnosis after receiving active monitoring.

**Figure S5. Patient-reported urinary, bowel and sexual symptoms by age groups by primary localised prostate cancer treatments over 6 years**

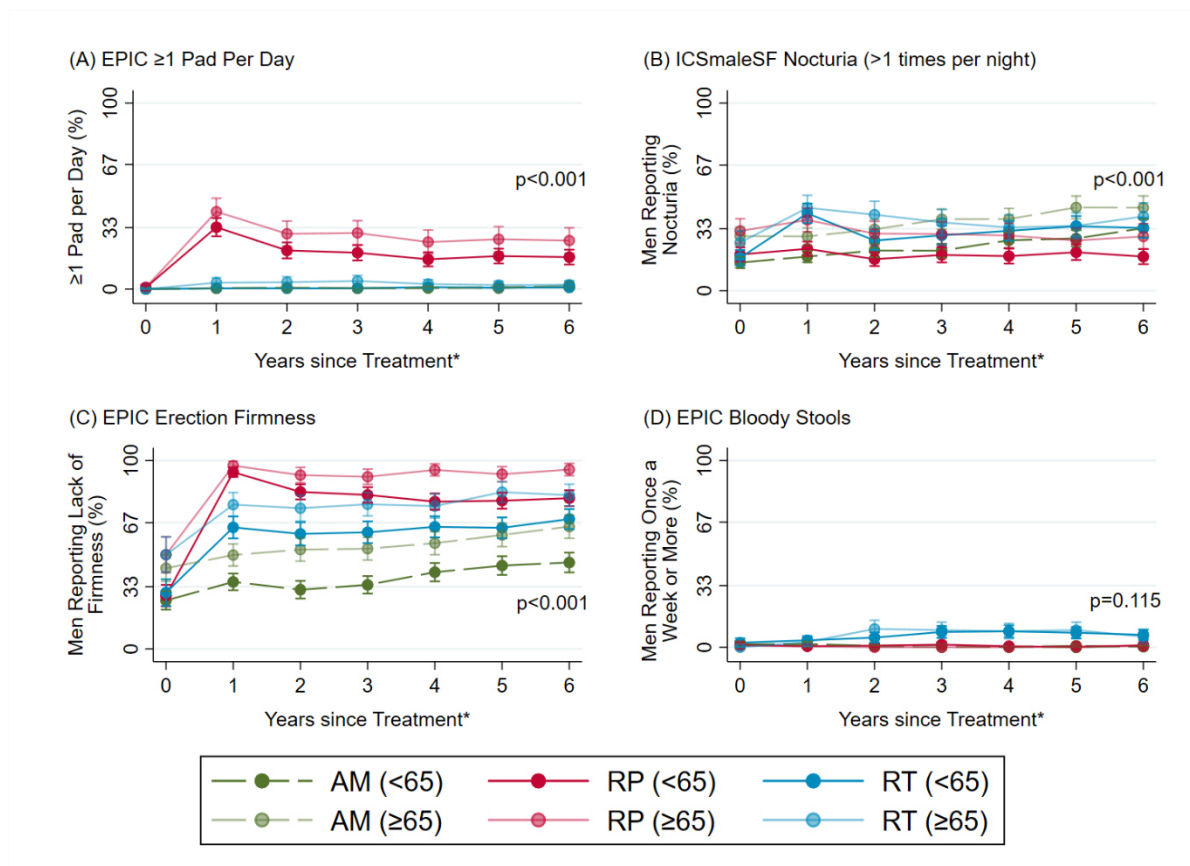

Abbreviations: AM, active monitoring; RP, radical prostatectomy; RT, EBRT; BT LDR brachytherapy. \*Time from treatment between diagnosis and start of radical treatment. Includes those who have completed a questionnaire within the previous year, e.g. "2 Years from Treatment" refers to the period between 1 year after treatment and 2 years after treatment. Higher scores or percentages indicate more severe symptoms. Points are estimated means from models with error bars representing 95% CIs. P values are from a likelihood ratio test comparing a mixed effects regression model with an interaction (age\*treatment) versus one without it.

**Table S1. Response rates for exemplar PROMs in the treatment received analysis**

| Assessment period | Completion rates: Completed <sup>a</sup> /expected <sup>b</sup> (%) |                                         |                 |
|-------------------|---------------------------------------------------------------------|-----------------------------------------|-----------------|
|                   | ICIQ score <sup>b</sup>                                             | EPIC sexual function score <sup>c</sup> | HADS anxiety    |
| Baseline          | 1807/2304 (78%)                                                     | 970/1283 (76%)                          | 2075/2560 (81%) |
| 0-1 years         | 2158/2374 (91%)                                                     | 1506/1658 (91%)                         | 2274/2512 (91%) |
| 1-2 years         | 1860/2372 (78%)                                                     | 1424/1868 (76%)                         | 1927/2410 (80%) |
| 2-3 years         | 1820/2289 (80%)                                                     | 1575/2002 (79%)                         | 1871/2290 (82%) |
| 3-4 years         | 1724/2175 (79%)                                                     | 1595/2056 (78%)                         | 1766/2175 (81%) |
| 4-5 years         | 1671/2056 (81%)                                                     | 1611/2059 (78%)                         | 1708/2056 (83%) |
| 5-6 years         | 1588/1955 (81%)                                                     | 1566/2039 (77%)                         | 1609/1955 (82%) |

<sup>a</sup>Questionnaires completed within the time frame, excluding time points censored after second treatments and unexpected, <sup>b</sup>Expected counts were calculated if the questionnaire was introduced before the assessment period (excluding time points censored after second treatments, after death or after 15<sup>th</sup> November 2015), <sup>b</sup>ICIQ introduced 1<sup>st</sup> October 2001, <sup>c</sup>EPIC introduced 1<sup>st</sup> March 2005.

**Table S2. Adjusted urinary symptoms corresponding to Figure 1 and subscales**

| Assessment period                                                            | AM                |      | RP                |     | RT                |     | BT                |    | P value <sup>a</sup> |
|------------------------------------------------------------------------------|-------------------|------|-------------------|-----|-------------------|-----|-------------------|----|----------------------|
|                                                                              | n (%) / Mean (SD) | N    | n (%) / Mean (SD) | N   | n (%) / Mean (SD) | N   | n (%) / Mean (SD) | N  |                      |
| <b>ICIQ questionnaire</b>                                                    |                   |      |                   |     |                   |     |                   |    |                      |
| <b>ICIQ Incontinence Score (0-21) – corresponding to Figure 1A</b>           |                   |      |                   |     |                   |     |                   |    |                      |
|                                                                              |                   |      |                   |     |                   |     |                   |    | <b>&lt;0.001</b>     |
| Baseline                                                                     | 1.10 (2.27)       | 784  | 1.28 (2.32)       | 561 | 1.16 (2.08)       | 461 | 1.31 (2.62)       | 51 |                      |
| 0-1 years                                                                    | 1.28 (2.36)       | 960  | 5.33 (4.59)       | 674 | 1.59 (2.52)       | 545 | 1.84 (2.86)       | 62 |                      |
| 1-2 years                                                                    | 1.38 (2.28)       | 813  | 4.46 (4.19)       | 572 | 1.71 (2.53)       | 477 | 1.73 (2.89)       | 63 |                      |
| 2-3 years                                                                    | 1.51 (2.44)       | 768  | 4.52 (4.13)       | 555 | 1.72 (2.62)       | 495 | 2.20 (3.33)       | 61 |                      |
| 3-4 years                                                                    | 1.65 (2.48)       | 691  | 4.32 (3.95)       | 542 | 1.91 (2.78)       | 482 | 1.90 (2.92)       | 58 |                      |
| 4-5 years                                                                    | 1.64 (2.56)       | 657  | 4.30 (3.90)       | 525 | 1.79 (2.69)       | 475 | 2.34 (3.63)       | 58 |                      |
| 5-6 years                                                                    | 1.72 (2.60)       | 588  | 4.41 (3.99)       | 514 | 1.82 (2.56)       | 471 | 2.17 (3.26)       | 58 |                      |
| <b>Incontinent (ICIQ score &gt;0)</b>                                        |                   |      |                   |     |                   |     |                   |    |                      |
|                                                                              |                   |      |                   |     |                   |     |                   |    | <b>&lt;0.001</b>     |
| Baseline                                                                     | 200 (26%)         | 784  | 168 (30%)         | 561 | 139 (30%)         | 461 | 14 (27%)          | 51 |                      |
| 0-1 years                                                                    | 284 (30%)         | 960  | 556 (82%)         | 674 | 196 (36%)         | 545 | 22 (35%)          | 62 |                      |
| 1-2 years                                                                    | 277 (34%)         | 813  | 432 (76%)         | 572 | 186 (39%)         | 477 | 22 (35%)          | 63 |                      |
| 2-3 years                                                                    | 277 (36%)         | 768  | 426 (77%)         | 554 | 189 (38%)         | 495 | 26 (43%)          | 61 |                      |
| 3-4 years                                                                    | 266 (38%)         | 691  | 415 (77%)         | 542 | 208 (43%)         | 482 | 25 (43%)          | 58 |                      |
| 4-5 years                                                                    | 250 (38%)         | 657  | 405 (77%)         | 525 | 195 (41%)         | 475 | 25 (43%)          | 58 |                      |
| 5-6 years                                                                    | 226 (38%)         | 588  | 403 (78%)         | 514 | 205 (44%)         | 471 | 26 (45%)          | 58 |                      |
| <b>ICIQ incontinence Problem (4+) – corresponding to Figure 1C</b>           |                   |      |                   |     |                   |     |                   |    |                      |
|                                                                              |                   |      |                   |     |                   |     |                   |    | <b>&lt;0.001</b>     |
| Baseline                                                                     | 14 (2%)           | 790  | 12 (2%)           | 566 | 9 (2%)            | 466 | 3 (6%)            | 52 |                      |
| 0-1 years                                                                    | 21 (2%)           | 973  | 118 (17%)         | 680 | 13 (2%)           | 554 | 4 (6%)            | 64 |                      |
| 1-2 years                                                                    | 13 (2%)           | 824  | 76 (13%)          | 577 | 18 (4%)           | 483 | 3 (5%)            | 63 |                      |
| 2-3 years                                                                    | 14 (2%)           | 774  | 75 (13%)          | 562 | 16 (3%)           | 497 | 3 (5%)            | 62 |                      |
| 3-4 years                                                                    | 22 (3%)           | 701  | 60 (11%)          | 549 | 16 (3%)           | 483 | 2 (3%)            | 58 |                      |
| 4-5 years                                                                    | 21 (3%)           | 660  | 63 (12%)          | 530 | 21 (4%)           | 479 | 3 (5%)            | 60 |                      |
| 5-6 years                                                                    | 24 (4%)           | 592  | 66 (13%)          | 517 | 16 (3%)           | 474 | 4 (7%)            | 58 |                      |
| <b>ICS male questionnaire</b>                                                |                   |      |                   |     |                   |     |                   |    |                      |
| <b>Voiding score (0-20) – corresponding to Figure 1E</b>                     |                   |      |                   |     |                   |     |                   |    |                      |
|                                                                              |                   |      |                   |     |                   |     |                   |    | <b>&lt;0.001</b>     |
| Baseline                                                                     | 3.24 (2.99)       | 888  | 3.43 (3.24)       | 634 | 3.16 (2.92)       | 507 | 3.17 (3.82)       | 59 |                      |
| 0-1 years                                                                    | 3.44 (3.14)       | 998  | 2.52 (2.89)       | 686 | 3.67 (3.41)       | 562 | 5.55 (3.89)       | 67 |                      |
| 1-2 years                                                                    | 3.68 (3.22)       | 847  | 2.29 (2.79)       | 591 | 3.14 (3.01)       | 488 | 4.31 (3.50)       | 64 |                      |
| 2-3 years                                                                    | 3.95 (3.36)       | 797  | 2.58 (2.89)       | 576 | 3.29 (3.05)       | 508 | 3.79 (3.58)       | 66 |                      |
| 3-4 years                                                                    | 4.08 (3.41)       | 720  | 2.43 (2.62)       | 557 | 3.27 (2.97)       | 492 | 3.55 (2.97)       | 60 |                      |
| 4-5 years                                                                    | 4.32 (3.46)       | 678  | 2.54 (2.74)       | 543 | 3.52 (3.17)       | 488 | 3.68 (3.19)       | 60 |                      |
| 5-6 years                                                                    | 4.43 (3.54)       | 606  | 2.64 (2.63)       | 524 | 3.43 (2.92)       | 482 | 3.73 (3.17)       | 59 |                      |
| <b>Incontinence score (0-24)</b>                                             |                   |      |                   |     |                   |     |                   |    |                      |
|                                                                              |                   |      |                   |     |                   |     |                   |    | <b>&lt;0.001</b>     |
| Baseline                                                                     | 1.71 (1.80)       | 887  | 1.85 (1.87)       | 634 | 1.76 (1.82)       | 506 | 1.83 (2.22)       | 59 |                      |
| 0-1 years                                                                    | 1.68 (1.84)       | 995  | 4.60 (3.68)       | 681 | 2.12 (2.05)       | 561 | 2.16 (1.78)       | 67 |                      |
| 1-2 years                                                                    | 1.80 (1.94)       | 844  | 4.19 (3.52)       | 582 | 2.07 (2.01)       | 489 | 2.00 (1.93)       | 64 |                      |
| 2-3 years                                                                    | 1.96 (2.05)       | 791  | 4.35 (3.49)       | 568 | 2.17 (2.13)       | 503 | 2.24 (2.37)       | 63 |                      |
| 3-4 years                                                                    | 2.02 (2.09)       | 710  | 4.07 (3.27)       | 552 | 2.21 (2.21)       | 490 | 1.82 (1.72)       | 60 |                      |
| 4-5 years                                                                    | 2.11 (2.07)       | 676  | 4.23 (3.28)       | 536 | 2.18 (2.15)       | 483 | 2.32 (2.16)       | 59 |                      |
| 5-6 years                                                                    | 2.14 (2.16)       | 605  | 4.08 (3.15)       | 525 | 2.24 (2.18)       | 478 | 2.30 (2.16)       | 60 |                      |
| <b>ICSmale QoL (“somewhat/a lot” of impact) – corresponding to Figure 1F</b> |                   |      |                   |     |                   |     |                   |    |                      |
|                                                                              |                   |      |                   |     |                   |     |                   |    | <b>&lt;0.001</b>     |
| Baseline                                                                     | 29 (3%)           | 897  | 19 (3%)           | 636 | 13 (3%)           | 511 | 3 (5%)            | 59 |                      |
| 0-1 years                                                                    | 20 (2%)           | 1003 | 91 (13%)          | 689 | 31 (6%)           | 563 | 9 (13%)           | 67 |                      |
| 1-2 years                                                                    | 25 (3%)           | 842  | 58 (10%)          | 590 | 15 (3%)           | 488 | 5 (8%)            | 64 |                      |
| 2-3 years                                                                    | 32 (4%)           | 791  | 63 (11%)          | 574 | 18 (4%)           | 504 | 5 (8%)            | 64 |                      |
| 3-4 years                                                                    | 31 (4%)           | 714  | 45 (8%)           | 559 | 20 (4%)           | 495 | 3 (5%)            | 60 |                      |
| 4-5 years                                                                    | 35 (5%)           | 674  | 44 (8%)           | 541 | 24 (5%)           | 487 | 5 (8%)            | 60 |                      |
| 5-6 years                                                                    | 32 (5%)           | 606  | 44 (8%)           | 528 | 22 (5%)           | 478 | 5 (8%)            | 60 |                      |
| <b>Daytime frequency (more frequent than once every three hours)</b>         |                   |      |                   |     |                   |     |                   |    |                      |
|                                                                              |                   |      |                   |     |                   |     |                   |    | <b>=0.293</b>        |
| Baseline                                                                     | 265 (30%)         | 888  | 229 (36%)         | 631 | 162 (32%)         | 502 | 12 (20%)          | 59 |                      |
| 0-1 years                                                                    | 312 (31%)         | 1000 | 280 (41%)         | 685 | 202 (36%)         | 556 | 29 (44%)          | 66 |                      |
| 1-2 years                                                                    | 255 (30%)         | 840  | 194 (33%)         | 586 | 154 (31%)         | 489 | 18 (29%)          | 63 |                      |
| 2-3 years                                                                    | 247 (31%)         | 790  | 193 (34%)         | 572 | 165 (33%)         | 503 | 21 (33%)          | 64 |                      |
| 3-4 years                                                                    | 224 (31%)         | 713  | 185 (34%)         | 550 | 162 (33%)         | 494 | 22 (37%)          | 60 |                      |
| 4-5 years                                                                    | 212 (32%)         | 670  | 190 (36%)         | 534 | 152 (31%)         | 483 | 19 (32%)          | 60 |                      |
| 5-6 years                                                                    | 194 (32%)         | 601  | 173 (33%)         | 519 | 159 (33%)         | 479 | 14 (24%)          | 59 |                      |
| <b>Nocturia (&gt;1 times per night) – corresponding to Figure 1G</b>         |                   |      |                   |     |                   |     |                   |    |                      |
|                                                                              |                   |      |                   |     |                   |     |                   |    | <b>&lt;0.001</b>     |
| Baseline                                                                     | 183 (20%)         | 894  | 147 (23%)         | 631 | 104 (21%)         | 507 | 9 (15%)           | 59 |                      |



|                                                                                         |               |     |               |     |               |     |               |    |                  |
|-----------------------------------------------------------------------------------------|---------------|-----|---------------|-----|---------------|-----|---------------|----|------------------|
| 0-1 years                                                                               | 223 (22%)     | 998 | 188 (27%)     | 685 | 239 (42%)     | 564 | 29 (43%)      | 67 |                  |
| 1-2 years                                                                               | 219 (26%)     | 844 | 126 (21%)     | 590 | 156 (32%)     | 488 | 19 (30%)      | 64 |                  |
| 2-3 years                                                                               | 221 (28%)     | 790 | 131 (23%)     | 573 | 161 (32%)     | 500 | 20 (32%)      | 63 |                  |
| 3-4 years                                                                               | 224 (31%)     | 715 | 123 (22%)     | 556 | 162 (33%)     | 497 | 16 (28%)      | 58 |                  |
| 4-5 years                                                                               | 230 (34%)     | 672 | 121 (22%)     | 538 | 166 (34%)     | 482 | 18 (30%)      | 60 |                  |
| 5-6 years                                                                               | 227 (38%)     | 601 | 114 (22%)     | 525 | 171 (36%)     | 479 | 15 (25%)      | 59 |                  |
| <b>EPIC questionnaire</b>                                                               |               |     |               |     |               |     |               |    |                  |
| <b>≥1 Pad per day – corresponding to Figure 1B</b>                                      |               |     |               |     |               |     |               |    |                  |
|                                                                                         |               |     |               |     |               |     |               |    | <b>&lt;0.001</b> |
| Baseline                                                                                | 0 (0%)        | 520 | 3 (1%)        | 362 | 0 (0%)        | 277 | 0 (0%)        | 39 |                  |
| 0-1 years                                                                               | 3 (0%)        | 756 | 197 (36%)     | 546 | 7 (2%)        | 442 | 1 (2%)        | 46 |                  |
| 1-2 years                                                                               | 4 (1%)        | 660 | 123 (24%)     | 517 | 7 (2%)        | 414 | 2 (4%)        | 45 |                  |
| 2-3 years                                                                               | 3 (0%)        | 691 | 126 (23%)     | 542 | 9 (2%)        | 466 | 2 (4%)        | 54 |                  |
| 3-4 years                                                                               | 4 (1%)        | 655 | 102 (19%)     | 535 | 8 (2%)        | 478 | 3 (5%)        | 56 |                  |
| 4-5 years                                                                               | 5 (1%)        | 646 | 109 (21%)     | 529 | 6 (1%)        | 485 | 3 (5%)        | 57 |                  |
| 5-6 years                                                                               | 8 (1%)        | 595 | 101 (20%)     | 505 | 7 (1%)        | 475 | 2 (3%)        | 59 |                  |
| <b>Urinary summary score (0-100, reversed<sup>b</sup>) – corresponding to Figure 1D</b> |               |     |               |     |               |     |               |    |                  |
|                                                                                         |               |     |               |     |               |     |               |    | <b>&lt;0.001</b> |
| Baseline                                                                                | 6.62 (8.52)   | 520 | 7.38 (9.21)   | 362 | 7.06 (8.69)   | 276 | 8.19 (10.23)  | 39 |                  |
| 0-1 years                                                                               | 6.99 (8.40)   | 756 | 15.70 (14.58) | 546 | 9.49 (10.85)  | 443 | 14.72 (12.52) | 46 |                  |
| 1-2 years                                                                               | 6.97 (8.27)   | 659 | 12.25 (12.64) | 516 | 7.90 (8.85)   | 413 | 13.57 (13.84) | 45 |                  |
| 2-3 years                                                                               | 7.78 (9.00)   | 693 | 12.47 (12.34) | 541 | 8.47 (10.06)  | 459 | 12.56 (14.16) | 54 |                  |
| 3-4 years                                                                               | 8.28 (9.56)   | 654 | 11.27 (11.43) | 536 | 8.20 (9.48)   | 477 | 9.48 (11.41)  | 56 |                  |
| 4-5 years                                                                               | 8.25 (9.31)   | 644 | 11.48 (11.50) | 529 | 8.23 (9.47)   | 483 | 10.72 (13.29) | 56 |                  |
| 5-6 years                                                                               | 8.96 (9.80)   | 594 | 11.11 (11.10) | 508 | 8.23 (8.95)   | 475 | 9.45 (11.19)  | 59 |                  |
| <b>Urinary function score (0-100, reversed<sup>b</sup>)</b>                             |               |     |               |     |               |     |               |    |                  |
|                                                                                         |               |     |               |     |               |     |               |    | <b>&lt;0.001</b> |
| Baseline                                                                                | 4.16 (7.41)   | 520 | 4.58 (8.61)   | 363 | 4.74 (7.60)   | 278 | 3.75 (7.01)   | 39 |                  |
| 0-1 years                                                                               | 4.92 (7.86)   | 758 | 18.55 (16.09) | 549 | 6.29 (8.70)   | 442 | 9.90 (10.19)  | 46 |                  |
| 1-2 years                                                                               | 4.56 (7.16)   | 660 | 14.28 (13.83) | 518 | 6.09 (8.23)   | 414 | 9.91 (11.33)  | 45 |                  |
| 2-3 years                                                                               | 5.23 (7.68)   | 693 | 14.68 (13.85) | 542 | 5.89 (8.51)   | 465 | 9.58 (11.61)  | 54 |                  |
| 3-4 years                                                                               | 5.59 (8.05)   | 656 | 13.29 (12.82) | 538 | 6.19 (8.70)   | 478 | 8.01 (10.90)  | 56 |                  |
| 4-5 years                                                                               | 5.69 (8.41)   | 647 | 13.65 (13.08) | 531 | 5.88 (8.08)   | 484 | 7.81 (11.21)  | 57 |                  |
| 5-6 years                                                                               | 6.09 (8.60)   | 595 | 13.35 (13.10) | 510 | 5.95 (7.67)   | 475 | 7.94 (9.74)   | 59 |                  |
| <b>Urinary bother score (0-100, reversed<sup>b</sup>)</b>                               |               |     |               |     |               |     |               |    |                  |
|                                                                                         |               |     |               |     |               |     |               |    | <b>=0.001</b>    |
| Baseline                                                                                | 8.38 (11.11)  | 520 | 9.38 (11.72)  | 364 | 8.67 (11.19)  | 275 | 11.36 (13.61) | 39 |                  |
| 0-1 years                                                                               | 8.50 (10.53)  | 753 | 13.62 (15.30) | 546 | 11.84 (14.02) | 443 | 18.17 (16.73) | 46 |                  |
| 1-2 years                                                                               | 8.70 (10.74)  | 657 | 10.78 (13.86) | 513 | 9.20 (11.06)  | 410 | 16.19 (17.17) | 45 |                  |
| 2-3 years                                                                               | 9.64 (11.70)  | 694 | 10.85 (13.23) | 542 | 10.15 (12.59) | 458 | 14.68 (18.07) | 54 |                  |
| 3-4 years                                                                               | 10.17 (12.31) | 653 | 9.79 (12.17)  | 532 | 9.63 (11.87)  | 476 | 10.52 (13.91) | 56 |                  |
| 4-5 years                                                                               | 10.06 (11.71) | 645 | 9.92 (12.22)  | 527 | 9.87 (12.19)  | 481 | 12.69 (16.26) | 56 |                  |
| 5-6 years                                                                               | 11.03 (12.60) | 592 | 9.46 (11.45)  | 507 | 9.90 (11.51)  | 476 | 10.53 (13.70) | 59 |                  |
| <b>Urinary incontinence score (0-100, reversed<sup>b</sup>)</b>                         |               |     |               |     |               |     |               |    |                  |
|                                                                                         |               |     |               |     |               |     |               |    | <b>&lt;0.001</b> |
| Baseline                                                                                | 5.95 (10.76)  | 513 | 6.38 (10.86)  | 358 | 6.86 (11.02)  | 273 | 5.49 (10.50)  | 39 |                  |
| 0-1 years                                                                               | 7.18 (11.33)  | 750 | 28.50 (24.93) | 533 | 8.55 (11.94)  | 438 | 10.61 (13.75) | 46 |                  |
| 1-2 years                                                                               | 7.04 (11.02)  | 649 | 21.89 (21.62) | 502 | 9.51 (12.59)  | 408 | 9.61 (13.79)  | 45 |                  |
| 2-3 years                                                                               | 7.86 (11.43)  | 681 | 22.96 (22.14) | 529 | 9.02 (12.32)  | 451 | 11.22 (16.99) | 53 |                  |
| 3-4 years                                                                               | 8.25 (11.94)  | 638 | 20.69 (20.19) | 527 | 9.44 (12.72)  | 474 | 11.58 (15.86) | 56 |                  |
| 4-5 years                                                                               | 8.42 (12.31)  | 636 | 21.29 (20.95) | 521 | 8.77 (11.88)  | 472 | 12.50 (18.10) | 56 |                  |
| 5-6 years                                                                               | 9.03 (12.29)  | 587 | 20.80 (20.45) | 500 | 9.25 (12.06)  | 464 | 10.56 (14.82) | 59 |                  |
| <b>Urinary irritative score (0-100, reversed<sup>b</sup>)</b>                           |               |     |               |     |               |     |               |    |                  |
|                                                                                         |               |     |               |     |               |     |               |    | <b>&lt;0.001</b> |
| Baseline                                                                                | 6.66 (8.60)   | 520 | 7.42 (9.45)   | 362 | 6.79 (8.52)   | 276 | 8.61 (10.35)  | 39 |                  |
| 0-1 years                                                                               | 6.45 (8.07)   | 756 | 7.78 (10.13)  | 546 | 9.11 (11.49)  | 442 | 16.07 (14.65) | 46 |                  |
| 1-2 years                                                                               | 6.50 (8.22)   | 659 | 6.14 (8.93)   | 517 | 6.49 (8.01)   | 413 | 14.68 (15.18) | 45 |                  |
| 2-3 years                                                                               | 7.19 (8.76)   | 693 | 5.99 (8.15)   | 541 | 7.56 (9.57)   | 460 | 12.37 (15.10) | 54 |                  |
| 3-4 years                                                                               | 7.74 (9.37)   | 654 | 5.20 (7.39)   | 536 | 6.93 (8.61)   | 477 | 7.46 (9.57)   | 56 |                  |
| 4-5 years                                                                               | 7.59 (8.75)   | 645 | 5.50 (7.23)   | 530 | 7.29 (9.13)   | 484 | 8.93 (11.00)  | 56 |                  |
| 5-6 years                                                                               | 8.24 (9.54)   | 594 | 5.20 (6.94)   | 508 | 7.07 (8.32)   | 475 | 8.17 (10.34)  | 59 |                  |

Abbreviations: AM=Active Monitoring, RP=Radical Prostatectomy, RT=Radiotherapy, BT=Brachytherapy, <sup>a</sup>P value from a likelihood ratio test comparing a mixed effects model, with and without treatment received as a covariate. Other covariates included a treatment cohort indicator (randomised/preference) and propensity scores. Baseline measures were not included, or adjusted for, based on this being an ‘as treated’ analysis.

<sup>b</sup>Scores were reversed so that higher scores indicate worse symptoms

**Table S3. Adjusted sexual symptoms corresponding to Figure 2 and subscales**

| Assessment period                                                                                                | AM                |     | RP                |     | RT                |     | BT                |    | P value <sup>a</sup> |
|------------------------------------------------------------------------------------------------------------------|-------------------|-----|-------------------|-----|-------------------|-----|-------------------|----|----------------------|
|                                                                                                                  | n (%) / Mean (SD) | N   | n (%) / Mean (SD) | N   | n (%) / Mean (SD) | N   | n (%) / Mean (SD) | N  |                      |
| <b>EPIC questionnaire</b>                                                                                        |                   |     |                   |     |                   |     |                   |    |                      |
| <b>Men reporting lack of firmness – corresponding to Figure 2A</b>                                               |                   |     |                   |     |                   |     |                   |    |                      |
|                                                                                                                  |                   |     |                   |     |                   |     |                   |    | <b>&lt;0.001</b>     |
| Baseline                                                                                                         | 164 (32%)         | 507 | 123 (35%)         | 352 | 105 (38%)         | 276 | 14 (37%)          | 38 |                      |
| 0-1 years                                                                                                        | 302 (41%)         | 735 | 514 (95%)         | 541 | 300 (69%)         | 433 | 23 (51%)          | 45 |                      |
| 1-2 years                                                                                                        | 255 (40%)         | 637 | 435 (86%)         | 504 | 267 (66%)         | 402 | 27 (61%)          | 44 |                      |
| 2-3 years                                                                                                        | 279 (42%)         | 670 | 452 (85%)         | 531 | 308 (68%)         | 454 | 29 (54%)          | 54 |                      |
| 3-4 years                                                                                                        | 302 (47%)         | 646 | 448 (84%)         | 534 | 319 (69%)         | 462 | 34 (60%)          | 57 |                      |
| 4-5 years                                                                                                        | 319 (50%)         | 632 | 438 (83%)         | 527 | 336 (71%)         | 470 | 34 (58%)          | 59 |                      |
| 5-6 years                                                                                                        | 310 (53%)         | 580 | 435 (85%)         | 512 | 346 (74%)         | 470 | 30 (52%)          | 58 |                      |
| <b>Men reporting problem (moderate/big) with erectile dysfunction – corresponding to Figure 2B</b>               |                   |     |                   |     |                   |     |                   |    |                      |
|                                                                                                                  |                   |     |                   |     |                   |     |                   |    | <b>&lt;0.001</b>     |
| Baseline                                                                                                         | 70 (14%)          | 501 | 61 (17%)          | 353 | 55 (20%)          | 277 | 4 (11%)           | 38 |                      |
| 0-1 years                                                                                                        | 143 (20%)         | 725 | 378 (70%)         | 540 | 186 (44%)         | 422 | 10 (22%)          | 46 |                      |
| 1-2 years                                                                                                        | 123 (19%)         | 638 | 310 (62%)         | 504 | 149 (38%)         | 396 | 19 (42%)          | 45 |                      |
| 2-3 years                                                                                                        | 143 (22%)         | 659 | 274 (52%)         | 528 | 184 (41%)         | 448 | 17 (33%)          | 52 |                      |
| 3-4 years                                                                                                        | 147 (23%)         | 639 | 284 (53%)         | 532 | 176 (38%)         | 460 | 18 (31%)          | 58 |                      |
| 4-5 years                                                                                                        | 152 (24%)         | 628 | 259 (50%)         | 523 | 186 (40%)         | 470 | 13 (22%)          | 59 |                      |
| 5-6 years                                                                                                        | 146 (26%)         | 572 | 252 (50%)         | 509 | 181 (39%)         | 459 | 17 (29%)          | 59 |                      |
| <b>Sexual summary score (0-100, reversed<sup>b</sup>)</b>                                                        |                   |     |                   |     |                   |     |                   |    |                      |
|                                                                                                                  |                   |     |                   |     |                   |     |                   |    | <b>&lt;0.001</b>     |
| Baseline                                                                                                         | 36.79 (20.91)     | 496 | 38.75 (23.32)     | 347 | 40.64 (25.32)     | 273 | 36.68 (19.80)     | 37 |                      |
| 0-1 years                                                                                                        | 40.86 (23.70)     | 717 | 76.12 (18.92)     | 533 | 62.17 (27.62)     | 424 | 49.00 (23.46)     | 45 |                      |
| 1-2 years                                                                                                        | 41.27 (23.86)     | 630 | 69.42 (21.71)     | 499 | 57.91 (25.49)     | 390 | 55.09 (24.27)     | 45 |                      |
| 2-3 years                                                                                                        | 42.67 (24.19)     | 650 | 68.87 (22.24)     | 519 | 59.56 (25.46)     | 444 | 53.30 (26.01)     | 52 |                      |
| 3-4 years                                                                                                        | 45.12 (24.66)     | 632 | 67.65 (23.06)     | 527 | 58.96 (25.61)     | 454 | 52.40 (25.56)     | 56 |                      |
| 4-5 years                                                                                                        | 45.90 (24.48)     | 618 | 67.66 (23.47)     | 518 | 60.62 (24.59)     | 465 | 50.92 (23.91)     | 59 |                      |
| 5-6 years                                                                                                        | 47.06 (24.17)     | 565 | 68.23 (22.88)     | 507 | 60.51 (24.93)     | 452 | 50.24 (23.85)     | 58 |                      |
| <b>Sexual function score (0-100, reversed<sup>b</sup>) – corresponding to Figure 2C</b>                          |                   |     |                   |     |                   |     |                   |    |                      |
|                                                                                                                  |                   |     |                   |     |                   |     |                   |    | <b>&lt;0.001</b>     |
| Baseline                                                                                                         | 44.07 (21.11)     | 498 | 45.70 (22.85)     | 348 | 48.26 (25.08)     | 273 | 43.17 (20.55)     | 37 |                      |
| 0-1 years                                                                                                        | 48.29 (23.95)     | 722 | 82.44 (17.74)     | 534 | 69.25 (27.21)     | 425 | 56.49 (24.98)     | 45 |                      |
| 1-2 years                                                                                                        | 48.61 (23.91)     | 628 | 75.77 (21.49)     | 501 | 64.38 (25.19)     | 392 | 60.42 (23.34)     | 45 |                      |
| 2-3 years                                                                                                        | 49.75 (24.23)     | 657 | 76.17 (21.84)     | 526 | 66.88 (25.17)     | 450 | 60.37 (25.61)     | 54 |                      |
| 3-4 years                                                                                                        | 52.46 (24.41)     | 641 | 75.41 (23.06)     | 531 | 66.44 (25.47)     | 459 | 60.02 (26.90)     | 57 |                      |
| 4-5 years                                                                                                        | 53.00 (24.42)     | 626 | 76.07 (23.26)     | 518 | 67.72 (24.46)     | 471 | 58.92 (24.71)     | 59 |                      |
| 5-6 years                                                                                                        | 55.33 (24.79)     | 578 | 77.01 (22.79)     | 505 | 68.69 (25.34)     | 461 | 58.01 (26.00)     | 58 |                      |
| <b>Sexual bother score (0-100, reversed<sup>b</sup>) – corresponding to Figure 2D</b>                            |                   |     |                   |     |                   |     |                   |    |                      |
|                                                                                                                  |                   |     |                   |     |                   |     |                   |    | <b>&lt;0.001</b>     |
| Baseline                                                                                                         | 20.10 (26.47)     | 496 | 23.07 (29.66)     | 347 | 24.14 (31.86)     | 270 | 21.55 (23.91)     | 38 |                      |
| 0-1 years                                                                                                        | 24.74 (29.69)     | 716 | 61.94 (32.29)     | 534 | 46.50 (37.78)     | 422 | 32.74 (29.67)     | 46 |                      |
| 1-2 years                                                                                                        | 25.18 (29.66)     | 634 | 55.29 (32.99)     | 500 | 43.57 (34.78)     | 390 | 41.57 (31.25)     | 43 |                      |
| 2-3 years                                                                                                        | 27.39 (30.69)     | 655 | 52.31 (34.90)     | 520 | 43.91 (35.33)     | 441 | 39.42 (33.66)     | 52 |                      |
| 3-4 years                                                                                                        | 28.91 (31.85)     | 634 | 50.43 (34.71)     | 527 | 42.52 (35.06)     | 456 | 34.54 (31.25)     | 57 |                      |
| 4-5 years                                                                                                        | 29.70 (31.14)     | 623 | 49.11 (35.83)     | 518 | 44.17 (35.38)     | 464 | 33.16 (30.14)     | 59 |                      |
| 5-6 years                                                                                                        | 29.55 (31.57)     | 569 | 49.04 (35.14)     | 503 | 42.51 (35.66)     | 454 | 32.20 (29.95)     | 59 |                      |
| <b>Men reporting impact (moderate/big) of sexual dysfunction on quality of life – corresponding to Figure 2E</b> |                   |     |                   |     |                   |     |                   |    |                      |
|                                                                                                                  |                   |     |                   |     |                   |     |                   |    | <b>&lt;0.001</b>     |
| Baseline                                                                                                         | 69 (14%)          | 500 | 57 (16%)          | 351 | 46 (17%)          | 274 | 4 (11%)           | 38 |                      |
| 0-1 years                                                                                                        | 134 (19%)         | 721 | 341 (64%)         | 537 | 179 (42%)         | 426 | 10 (22%)          | 46 |                      |
| 1-2 years                                                                                                        | 117 (18%)         | 639 | 271 (54%)         | 502 | 155 (39%)         | 398 | 17 (39%)          | 44 |                      |
| 2-3 years                                                                                                        | 125 (19%)         | 657 | 249 (48%)         | 523 | 169 (38%)         | 447 | 16 (31%)          | 52 |                      |
| 3-4 years                                                                                                        | 133 (21%)         | 638 | 238 (45%)         | 531 | 165 (36%)         | 459 | 14 (25%)          | 57 |                      |
| 4-5 years                                                                                                        | 141 (22%)         | 627 | 242 (46%)         | 524 | 168 (36%)         | 469 | 12 (20%)          | 59 |                      |
| 5-6 years                                                                                                        | 124 (22%)         | 572 | 217 (43%)         | 509 | 168 (37%)         | 460 | 15 (25%)          | 59 |                      |

Abbreviations: AM=Active Monitoring, RP=Radical Prostatectomy, RT=Radiotherapy, BT=Brachytherapy, <sup>a</sup>P value from a likelihood ratio test comparing a mixed effects model, with and without treatment received as a covariate. Other covariates included a treatment cohort indicator (randomised/preference) and propensity scores. Baseline measures were not included, or adjusted for, based on this being an ‘as treated’ analysis.

<sup>b</sup>Scores were reversed so that higher scores indicate worse symptoms

**Table S4. Adjusted bowel symptoms corresponding to Figure 3 and subscales**

| Assessment period                                        | AM                |     | RP                |     | RT                |     | BT                |    | P value <sup>a</sup> |
|----------------------------------------------------------|-------------------|-----|-------------------|-----|-------------------|-----|-------------------|----|----------------------|
|                                                          | n (%) / Mean (SD) | N   | n (%) / Mean (SD) | N   | n (%) / Mean (SD) | N   | n (%) / Mean (SD) | N  |                      |
| <b>EPIC questionnaire</b>                                |                   |     |                   |     |                   |     |                   |    |                      |
| <b>Bowel summary score</b>                               |                   |     |                   |     |                   |     |                   |    |                      |
|                                                          | <b>&lt;0.001</b>  |     |                   |     |                   |     |                   |    |                      |
| Baseline                                                 | 6.22 (7.75)       | 517 | 6.82 (8.34)       | 362 | 5.39 (6.93)       | 276 | 7.60 (10.59)      | 39 |                      |
| 0-1 years                                                | 5.87 (8.37)       | 755 | 5.59 (7.39)       | 546 | 11.42 (13.91)     | 445 | 10.63 (10.85)     | 45 |                      |
| 1-2 years                                                | 5.86 (8.27)       | 657 | 5.30 (7.36)       | 516 | 10.99 (12.07)     | 415 | 10.41 (11.31)     | 45 |                      |
| 2-3 years                                                | 6.20 (9.47)       | 683 | 5.18 (6.92)       | 544 | 9.78 (11.21)      | 464 | 8.63 (11.51)      | 53 |                      |
| 3-4 years                                                | 6.23 (9.49)       | 657 | 5.00 (7.10)       | 536 | 9.02 (11.19)      | 475 | 7.79 (10.01)      | 58 |                      |
| 4-5 years                                                | 6.13 (8.97)       | 647 | 5.15 (7.43)       | 535 | 8.91 (9.93)       | 481 | 7.41 (12.04)      | 60 |                      |
| 5-6 years                                                | 6.23 (9.40)       | 591 | 5.08 (6.78)       | 520 | 9.10 (10.70)      | 475 | 8.33 (11.06)      | 60 |                      |
| <b>Bowel function score – corresponding to Figure 3A</b> |                   |     |                   |     |                   |     |                   |    |                      |
|                                                          | <b>&lt;0.001</b>  |     |                   |     |                   |     |                   |    |                      |
| Baseline                                                 | 7.66 (8.42)       | 517 | 8.50 (8.71)       | 364 | 7.25 (7.79)       | 279 | 7.42 (9.60)       | 39 |                      |
| 0-1 years                                                | 6.85 (8.50)       | 758 | 7.13 (8.17)       | 548 | 11.23 (12.43)     | 446 | 9.84 (9.79)       | 45 |                      |
| 1-2 years                                                | 6.94 (8.24)       | 657 | 6.77 (7.68)       | 518 | 10.54 (10.00)     | 415 | 9.38 (9.82)       | 45 |                      |
| 2-3 years                                                | 7.18 (9.38)       | 685 | 6.54 (7.27)       | 543 | 9.83 (10.01)      | 465 | 8.96 (10.07)      | 53 |                      |
| 3-4 years                                                | 7.00 (8.80)       | 660 | 6.28 (7.54)       | 538 | 9.38 (9.99)       | 477 | 8.56 (8.51)       | 58 |                      |
| 4-5 years                                                | 7.14 (9.23)       | 651 | 6.62 (7.66)       | 537 | 9.20 (9.14)       | 481 | 7.62 (11.38)      | 60 |                      |
| 5-6 years                                                | 7.37 (9.07)       | 591 | 6.44 (7.21)       | 522 | 9.50 (9.87)       | 477 | 8.63 (9.67)       | 60 |                      |
| <b>Bowel bother score – corresponding to Figure 3B</b>   |                   |     |                   |     |                   |     |                   |    |                      |
|                                                          | <b>&lt;0.001</b>  |     |                   |     |                   |     |                   |    |                      |
| Baseline                                                 | 4.87 (9.50)       | 519 | 5.09 (10.15)      | 363 | 3.56 (7.73)       | 276 | 7.78 (13.56)      | 39 |                      |
| 0-1 years                                                | 4.87 (9.84)       | 756 | 4.03 (8.35)       | 547 | 11.58 (17.09)     | 445 | 11.43 (13.65)     | 45 |                      |
| 1-2 years                                                | 4.78 (9.93)       | 659 | 3.81 (8.69)       | 518 | 11.42 (16.27)     | 416 | 11.43 (15.03)     | 45 |                      |
| 2-3 years                                                | 5.25 (11.06)      | 691 | 3.83 (8.44)       | 546 | 9.73 (14.30)      | 466 | 8.57 (15.08)      | 55 |                      |
| 3-4 years                                                | 5.42 (11.57)      | 662 | 3.72 (8.26)       | 538 | 8.68 (14.10)      | 479 | 7.02 (13.43)      | 58 |                      |
| 4-5 years                                                | 5.07 (10.17)      | 653 | 3.69 (8.81)       | 537 | 8.65 (13.10)      | 488 | 7.20 (13.82)      | 60 |                      |
| 5-6 years                                                | 5.09 (11.18)      | 599 | 3.74 (8.27)       | 521 | 8.55 (13.47)      | 482 | 8.04 (14.77)      | 60 |                      |
| <b>Loose stools – corresponding to Figure 3C</b>         |                   |     |                   |     |                   |     |                   |    |                      |
|                                                          | <b>&lt;0.001</b>  |     |                   |     |                   |     |                   |    |                      |
| Baseline                                                 | 87 (17%)          | 517 | 62 (17%)          | 364 | 42 (15%)          | 280 | 7 (18%)           | 39 |                      |
| 0-1 years                                                | 111 (15%)         | 759 | 59 (11%)          | 549 | 106 (24%)         | 446 | 5 (11%)           | 45 |                      |
| 1-2 years                                                | 78 (12%)          | 657 | 65 (13%)          | 518 | 78 (19%)          | 414 | 6 (13%)           | 46 |                      |
| 2-3 years                                                | 89 (13%)          | 688 | 60 (11%)          | 543 | 75 (16%)          | 466 | 8 (15%)           | 53 |                      |
| 3-4 years                                                | 78 (12%)          | 659 | 54 (10%)          | 539 | 75 (16%)          | 478 | 8 (14%)           | 58 |                      |
| 4-5 years                                                | 89 (14%)          | 653 | 55 (10%)          | 541 | 83 (17%)          | 482 | 5 (8%)            | 60 |                      |
| 5-6 years                                                | 77 (13%)          | 598 | 55 (10%)          | 526 | 76 (16%)          | 478 | 8 (13%)           | 60 |                      |
| <b>Faecal incontinence – corresponding to Figure 3D</b>  |                   |     |                   |     |                   |     |                   |    |                      |
|                                                          | <b>&lt;0.001</b>  |     |                   |     |                   |     |                   |    |                      |
| Baseline                                                 | 17 (3%)           | 518 | 10 (3%)           | 365 | 5 (2%)            | 280 | 0 (0%)            | 39 |                      |
| 0-1 years                                                | 23 (3%)           | 759 | 5 (1%)            | 549 | 57 (13%)          | 446 | 8 (18%)           | 45 |                      |
| 1-2 years                                                | 21 (3%)           | 656 | 11 (2%)           | 518 | 46 (11%)          | 414 | 2 (4%)            | 46 |                      |
| 2-3 years                                                | 32 (5%)           | 688 | 8 (1%)            | 545 | 36 (8%)           | 466 | 4 (8%)            | 53 |                      |
| 3-4 years                                                | 23 (3%)           | 660 | 12 (2%)           | 538 | 43 (9%)           | 475 | 2 (3%)            | 58 |                      |
| 4-5 years                                                | 27 (4%)           | 652 | 10 (2%)           | 540 | 31 (6%)           | 483 | 2 (3%)            | 60 |                      |
| 5-6 years                                                | 26 (4%)           | 597 | 16 (3%)           | 524 | 46 (10%)          | 477 | 5 (8%)            | 60 |                      |
| <b>Bloody stools – corresponding to Figure 3E</b>        |                   |     |                   |     |                   |     |                   |    |                      |
|                                                          | <b>&lt;0.001</b>  |     |                   |     |                   |     |                   |    |                      |
| Baseline                                                 | 7 (1%)            | 516 | 4 (1%)            | 364 | 4 (1%)            | 279 | 0 (0%)            | 39 |                      |
| 0-1 years                                                | 12 (2%)           | 758 | 3 (1%)            | 550 | 15 (3%)           | 446 | 1 (2%)            | 45 |                      |
| 1-2 years                                                | 4 (1%)            | 658 | 3 (1%)            | 519 | 29 (7%)           | 414 | 3 (7%)            | 46 |                      |
| 2-3 years                                                | 5 (1%)            | 687 | 5 (1%)            | 543 | 40 (9%)           | 466 | 2 (4%)            | 53 |                      |
| 3-4 years                                                | 1 (0%)            | 659 | 2 (0%)            | 539 | 41 (9%)           | 478 | 1 (2%)            | 58 |                      |
| 4-5 years                                                | 3 (0%)            | 652 | 1 (0%)            | 540 | 40 (8%)           | 482 | 2 (3%)            | 60 |                      |
| 5-6 years                                                | 2 (0%)            | 597 | 5 (1%)            | 526 | 30 (6%)           | 477 | 2 (3%)            | 60 |                      |
| <b>Bowel habits – corresponding to Figure 3F</b>         |                   |     |                   |     |                   |     |                   |    |                      |
|                                                          | <b>&lt;0.001</b>  |     |                   |     |                   |     |                   |    |                      |
| Baseline                                                 | 12 (2%)           | 520 | 9 (2%)            | 363 | 4 (1%)            | 277 | 1 (3%)            | 39 |                      |
| 0-1 years                                                | 14 (2%)           | 758 | 13 (2%)           | 548 | 32 (7%)           | 445 | 3 (7%)            | 45 |                      |
| 1-2 years                                                | 10 (2%)           | 661 | 7 (1%)            | 521 | 31 (7%)           | 416 | 5 (11%)           | 45 |                      |
| 2-3 years                                                | 11 (2%)           | 693 | 8 (1%)            | 548 | 21 (5%)           | 466 | 2 (4%)            | 55 |                      |
| 3-4 years                                                | 18 (3%)           | 666 | 10 (2%)           | 538 | 16 (3%)           | 480 | 4 (7%)            | 58 |                      |
| 4-5 years                                                | 13 (2%)           | 653 | 12 (2%)           | 539 | 18 (4%)           | 488 | 3 (5%)            | 60 |                      |
| 5-6 years                                                | 16 (3%)           | 603 | 7 (1%)            | 523 | 16 (3%)           | 483 | 3 (5%)            | 60 |                      |

Abbreviations: AM=Active Monitoring, RP=Radical Prostatectomy, RT=Radiotherapy, BT=Brachytherapy, <sup>a</sup>P value from a likelihood ratio test comparing a mixed effects model, with and without treatment received as a covariate. Other covariates included a treatment cohort indicator (randomised/preference) and propensity scores. Baseline measures were not included, or adjusted for, based on this being an 'as treated' analysis.

**Table S5. Adjusted symptoms from immediate radical treatments or after active monitoring corresponding to Figure S3**

| Assessment period                                 | RP                |     | AM -> RP          |     | P value <sup>a</sup> | RT                |     | AM -> RT          |     | P value <sup>b</sup> |               |
|---------------------------------------------------|-------------------|-----|-------------------|-----|----------------------|-------------------|-----|-------------------|-----|----------------------|---------------|
|                                                   | n (%) / Mean (SD) | N   | n (%) / Mean (SD) | N   |                      | n (%) / Mean (SD) | N   | n (%) / Mean (SD) | N   |                      |               |
| <b>EPIC: ≥1 Pad per day</b>                       |                   |     |                   |     | <b>=0.001</b>        |                   |     |                   |     |                      | <b>=0.911</b> |
| Baseline                                          | 3 (1%)            | 362 | 2 (1%)            | 149 |                      | 0 (0%)            | 277 | 1 (1%)            | 121 |                      |               |
| 0-1 years                                         | 197 (36%)         | 546 | 62 (48%)          | 129 |                      | 7 (2%)            | 442 | 0 (0%)            | 113 |                      |               |
| 1-2 years                                         | 123 (24%)         | 517 | 25 (25%)          | 100 |                      | 7 (2%)            | 414 | 3 (4%)            | 73  |                      |               |
| 2-3 years                                         | 126 (23%)         | 542 | 25 (33%)          | 75  |                      | 9 (2%)            | 466 | 2 (4%)            | 53  |                      |               |
| 3-4 years                                         | 102 (19%)         | 535 | 12 (28%)          | 43  |                      | 8 (2%)            | 478 | 1 (4%)            | 28  |                      |               |
| <b>ICS male: Nocturia (&gt;1 times per night)</b> |                   |     |                   |     | <b>=0.277</b>        |                   |     |                   |     |                      | <b>=0.087</b> |
| Baseline                                          | 147 (23%)         | 631 | 39 (25%)          | 154 |                      | 104 (21%)         | 507 | 32 (25%)          | 129 |                      |               |
| 0-1 years                                         | 188 (27%)         | 685 | 41 (31%)          | 131 |                      | 239 (42%)         | 564 | 61 (52%)          | 117 |                      |               |
| 1-2 years                                         | 126 (21%)         | 590 | 20 (20%)          | 101 |                      | 156 (32%)         | 488 | 30 (38%)          | 79  |                      |               |
| 2-3 years                                         | 131 (23%)         | 573 | 14 (19%)          | 75  |                      | 161 (32%)         | 500 | 20 (38%)          | 53  |                      |               |
| 3-4 years                                         | 123 (22%)         | 556 | 11 (24%)          | 46  |                      | 162 (33%)         | 497 | 12 (41%)          | 29  |                      |               |
| <b>EPIC: Men reporting lack of firmness</b>       |                   |     |                   |     | <b>=0.033</b>        |                   |     |                   |     |                      | <b>=0.002</b> |
| Baseline                                          | 123 (35%)         | 352 | 62 (43%)          | 145 |                      | 105 (38%)         | 276 | 56 (47%)          | 119 |                      |               |
| 0-1 years                                         | 514 (95%)         | 541 | 119 (96%)         | 124 |                      | 300 (69%)         | 433 | 97 (87%)          | 112 |                      |               |
| 1-2 years                                         | 435 (86%)         | 504 | 89 (94%)          | 95  |                      | 267 (66%)         | 402 | 63 (84%)          | 75  |                      |               |
| 2-3 years                                         | 452 (85%)         | 531 | 63 (89%)          | 71  |                      | 308 (68%)         | 454 | 39 (74%)          | 53  |                      |               |
| 3-4 years                                         | 448 (84%)         | 534 | 39 (89%)          | 44  |                      | 319 (69%)         | 462 | 21 (81%)          | 26  |                      |               |
| <b>EPIC: Bloody stools</b>                        |                   |     |                   |     | <b>=0.478</b>        |                   |     |                   |     |                      | <b>=0.907</b> |
| Baseline                                          | 4 (1%)            | 364 | 1 (1%)            | 149 |                      | 4 (1%)            | 279 | 0 (0%)            | 119 |                      |               |
| 0-1 years                                         | 3 (1%)            | 550 | 1 (1%)            | 131 |                      | 15 (3%)           | 446 | 6 (5%)            | 115 |                      |               |
| 1-2 years                                         | 3 (1%)            | 519 | 0 (0%)            | 99  |                      | 29 (7%)           | 414 | 6 (8%)            | 77  |                      |               |
| 2-3 years                                         | 5 (1%)            | 543 | 1 (1%)            | 72  |                      | 40 (9%)           | 466 | 6 (11%)           | 54  |                      |               |
| 3-4 years                                         | 2 (0%)            | 539 | 2 (4%)            | 46  |                      | 41 (9%)           | 478 | 2 (7%)            | 29  |                      |               |

Abbreviation: RP=Radical Prostatectomy, RT=Radiotherapy, AM->RP and AM->RT refer to those who commenced with active monitoring for at least one year before switching to radical prostatectomy or radiotherapy, respectively. <sup>a</sup>P value from a likelihood ratio test comparing a mixed effects model, with and without treatment received (RP vs. AM->RP) as a covariate. Other covariates included a treatment cohort indicator (randomised/preference) and propensity scores. Baseline measures were not included, or adjusted for, based on this being an 'as treated' analysis. <sup>b</sup>P value from a likelihood ratio test comparing a mixed effects model, with and without treatment received (RT vs. AM->RT) as a covariate with other covariates, described above.

**Table S6. Adjusted quality of life items by treatment received corresponding to Figure S4**

| Assessment period                                   | AM                |     | RP                |     | RT                |     | BT                |    | P value <sup>a</sup> |
|-----------------------------------------------------|-------------------|-----|-------------------|-----|-------------------|-----|-------------------|----|----------------------|
|                                                     | n (%) / Mean (SD) | N   | n (%) / Mean (SD) | N   | n (%) / Mean (SD) | N   | n (%) / Mean (SD) | N  |                      |
| <b>12-Item Short Form Survey (SF-12)</b>            |                   |     |                   |     |                   |     |                   |    |                      |
| <b>Physical weight</b>                              |                   |     |                   |     |                   |     |                   |    | <b>=0.012</b>        |
| Baseline                                            | 49.14 (8.32)      | 794 | 48.40 (7.50)      | 574 | 49.00 (7.68)      | 448 | 48.40 (8.19)      | 59 |                      |
| 0-1 years                                           | 49.44 (8.36)      | 915 | 50.26 (8.75)      | 629 | 50.98 (9.39)      | 526 | 48.28 (8.42)      | 63 |                      |
| 1-2 years                                           | 49.42 (8.44)      | 790 | 49.97 (8.52)      | 555 | 49.74 (8.35)      | 448 | 48.81 (7.65)      | 57 |                      |
| 2-3 years                                           | 50.21 (8.93)      | 739 | 50.66 (9.04)      | 538 | 50.98 (9.47)      | 466 | 49.03 (8.61)      | 63 |                      |
| 3-4 years                                           | 50.72 (9.24)      | 660 | 50.97 (9.21)      | 528 | 51.05 (9.45)      | 461 | 49.06 (9.02)      | 53 |                      |
| 4-5 years                                           | 50.64 (9.04)      | 633 | 50.93 (9.57)      | 500 | 52.41 (10.28)     | 451 | 49.36 (7.79)      | 56 |                      |
| 5-6 years                                           | 51.41 (9.31)      | 555 | 50.98 (9.63)      | 471 | 52.31 (9.79)      | 449 | 49.66 (8.51)      | 57 |                      |
| <b>Mental weight</b>                                |                   |     |                   |     |                   |     |                   |    | <b>=0.250</b>        |
| Baseline                                            | 46.46 (8.12)      | 794 | 46.29 (7.72)      | 574 | 45.54 (6.59)      | 448 | 46.53 (8.72)      | 59 |                      |
| 0-1 years                                           | 46.20 (7.74)      | 915 | 46.69 (8.89)      | 629 | 47.22 (8.91)      | 526 | 46.53 (6.53)      | 63 |                      |
| 1-2 years                                           | 45.77 (7.57)      | 790 | 46.82 (9.11)      | 555 | 46.52 (8.34)      | 448 | 45.22 (6.93)      | 57 |                      |
| 2-3 years                                           | 45.60 (7.68)      | 739 | 46.25 (8.44)      | 538 | 46.32 (8.18)      | 466 | 45.71 (8.15)      | 63 |                      |
| 3-4 years                                           | 45.97 (7.94)      | 660 | 45.75 (7.95)      | 528 | 46.13 (7.94)      | 461 | 47.11 (9.47)      | 53 |                      |
| 4-5 years                                           | 45.94 (7.99)      | 633 | 46.81 (8.67)      | 500 | 46.25 (8.34)      | 451 | 45.82 (9.27)      | 56 |                      |
| 5-6 years                                           | 46.16 (8.38)      | 555 | 46.18 (8.18)      | 471 | 46.63 (8.32)      | 449 | 46.45 (9.53)      | 57 |                      |
| <b>Hospital Anxiety and Depression Scale (HADS)</b> |                   |     |                   |     |                   |     |                   |    |                      |
| <b>Anxiety cases (score ≥8)</b>                     |                   |     |                   |     |                   |     |                   |    | <b>=0.768</b>        |
| Baseline                                            | 179 (20%)         | 888 | 129 (21%)         | 624 | 93 (18%)          | 504 | 16 (27%)          | 59 |                      |
| 0-1 years                                           | 137 (14%)         | 995 | 95 (14%)          | 679 | 77 (14%)          | 563 | 6 (9%)            | 66 |                      |
| 1-2 years                                           | 109 (13%)         | 836 | 74 (13%)          | 586 | 74 (15%)          | 485 | 6 (9%)            | 64 |                      |
| 2-3 years                                           | 92 (12%)          | 786 | 74 (13%)          | 574 | 81 (16%)          | 502 | 5 (8%)            | 65 |                      |
| 3-4 years                                           | 98 (14%)          | 715 | 78 (14%)          | 553 | 61 (12%)          | 490 | 9 (16%)           | 58 |                      |
| 4-5 years                                           | 89 (13%)          | 674 | 71 (13%)          | 535 | 68 (14%)          | 488 | 4 (7%)            | 56 |                      |
| 5-6 years                                           | 65 (11%)          | 598 | 75 (14%)          | 518 | 60 (13%)          | 477 | 7 (12%)           | 60 |                      |
| <b>Depression cases (score ≥8)</b>                  |                   |     |                   |     |                   |     |                   |    | <b>=0.027</b>        |
| Baseline                                            | 54 (6%)           | 880 | 25 (4%)           | 622 | 23 (5%)           | 505 | 2 (3%)            | 58 |                      |
| 0-1 years                                           | 58 (6%)           | 994 | 54 (8%)           | 684 | 46 (8%)           | 561 | 3 (5%)            | 66 |                      |
| 1-2 years                                           | 44 (5%)           | 833 | 39 (7%)           | 590 | 34 (7%)           | 486 | 2 (3%)            | 64 |                      |
| 2-3 years                                           | 41 (5%)           | 793 | 44 (8%)           | 575 | 45 (9%)           | 505 | 4 (6%)            | 65 |                      |
| 3-4 years                                           | 48 (7%)           | 718 | 38 (7%)           | 552 | 43 (9%)           | 492 | 2 (3%)            | 58 |                      |
| 4-5 years                                           | 51 (8%)           | 672 | 42 (8%)           | 535 | 46 (9%)           | 491 | 3 (5%)            | 58 |                      |
| 5-6 years                                           | 45 (8%)           | 597 | 42 (8%)           | 515 | 37 (8%)           | 479 | 5 (8%)            | 60 |                      |

Abbreviation: AM=Active Monitoring, RP=Radical Prostatectomy, RT=Radiotherapy, BT=Brachytherapy, <sup>a</sup>P value from a likelihood ratio test comparing a mixed effects model, with and without treatment received as a covariate, adjusting for the measure at baseline. Other covariates included a treatment cohort indicator (randomised/preference) and propensity scores. Baseline measures were not included, or adjusted for, based on this being an 'as treated' analysis.

**Table S7. Adjusted quality of life of radical treatments after active monitoring and immediate: radical treatment corresponding to Figure S5**

| Assessment period                                   | AM                |     | AM -> RP          |     | P value       | RT                |     | AM -> RT          |     | P value |                  |
|-----------------------------------------------------|-------------------|-----|-------------------|-----|---------------|-------------------|-----|-------------------|-----|---------|------------------|
|                                                     | n (%) / Mean (SD) | N   | n (%) / Mean (SD) | N   |               | n (%) / Mean (SD) | N   | n (%) / Mean (SD) | N   |         |                  |
| <b>12-Item Short Form Survey (SF-12)</b>            |                   |     |                   |     |               |                   |     |                   |     |         |                  |
| <b>Physical weight</b>                              |                   |     |                   |     | <b>=0.554</b> |                   |     |                   |     |         | <b>=0.020</b>    |
| Baseline                                            | 48.40 (7.50)      | 574 | 49.18 (8.48)      | 147 |               | 49.00 (7.68)      | 448 | 51.14 (9.29)      | 113 |         |                  |
| 0-1 years                                           | 50.26 (8.75)      | 629 | 51.78 (9.51)      | 129 |               | 50.98 (9.39)      | 526 | 53.37 (10.53)     | 110 |         |                  |
| 1-2 years                                           | 49.97 (8.52)      | 555 | 49.89 (9.03)      | 100 |               | 49.74 (8.35)      | 448 | 53.97 (11.03)     | 68  |         |                  |
| 2-3 years                                           | 50.66 (9.04)      | 538 | 50.06 (9.78)      | 72  |               | 50.98 (9.47)      | 466 | 52.93 (11.55)     | 49  |         |                  |
| 3-4 years                                           | 50.97 (9.21)      | 528 | 51.26 (10.83)     | 42  |               | 51.05 (9.45)      | 461 | 53.82 (11.44)     | 27  |         |                  |
| <b>Mental weight</b>                                |                   |     |                   |     | <b>=0.224</b> |                   |     |                   |     |         | <b>=0.487</b>    |
| Baseline                                            | 46.29 (7.72)      | 574 | 47.40 (9.31)      | 147 |               | 45.54 (6.59)      | 448 | 46.33 (8.36)      | 113 |         |                  |
| 0-1 years                                           | 46.69 (8.89)      | 629 | 47.81 (9.75)      | 129 |               | 47.22 (8.91)      | 526 | 47.68 (10.03)     | 110 |         |                  |
| 1-2 years                                           | 46.82 (9.11)      | 555 | 47.05 (9.48)      | 100 |               | 46.52 (8.34)      | 448 | 47.42 (8.37)      | 68  |         |                  |
| 2-3 years                                           | 46.25 (8.44)      | 538 | 46.73 (9.80)      | 72  |               | 46.32 (8.18)      | 466 | 47.79 (9.00)      | 49  |         |                  |
| 3-4 years                                           | 45.75 (7.95)      | 528 | 48.28 (11.71)     | 42  |               | 46.13 (7.94)      | 461 | 48.01 (8.27)      | 27  |         |                  |
| <b>Hospital Anxiety and Depression Scale (HADS)</b> |                   |     |                   |     |               |                   |     |                   |     |         |                  |
| <b>Anxiety cases (score ≥8)</b>                     |                   |     |                   |     | <b>=0.630</b> |                   |     |                   |     |         | <b>=0.574</b>    |
| Baseline                                            | 129 (21%)         | 624 | 33 (22%)          | 153 |               | 93 (18%)          | 504 | 22 (17%)          | 128 |         |                  |
| 0-1 years                                           | 95 (14%)          | 679 | 18 (13%)          | 135 |               | 77 (14%)          | 563 | 17 (15%)          | 117 |         |                  |
| 1-2 years                                           | 74 (13%)          | 586 | 14 (14%)          | 100 |               | 74 (15%)          | 485 | 10 (13%)          | 78  |         |                  |
| 2-3 years                                           | 74 (13%)          | 574 | 11 (15%)          | 75  |               | 81 (16%)          | 502 | 8 (15%)           | 54  |         |                  |
| 3-4 years                                           | 78 (14%)          | 553 | 7 (16%)           | 45  |               | 61 (12%)          | 490 | 6 (22%)           | 27  |         |                  |
| <b>Depression cases (score ≥8)</b>                  |                   |     |                   |     | <b>=0.084</b> |                   |     |                   |     |         | <b>&gt;0.999</b> |
| Baseline                                            | 25 (4%)           | 622 | 13 (8%)           | 154 |               | 23 (5%)           | 505 | 11 (9%)           | 128 |         |                  |
| 0-1 years                                           | 54 (8%)           | 684 | 13 (10%)          | 134 |               | 46 (8%)           | 561 | 12 (10%)          | 118 |         |                  |
| 1-2 years                                           | 39 (7%)           | 590 | 8 (8%)            | 101 |               | 34 (7%)           | 486 | 7 (9%)            | 79  |         |                  |
| 2-3 years                                           | 44 (8%)           | 575 | 9 (12%)           | 76  |               | 45 (9%)           | 505 | 4 (7%)            | 55  |         |                  |
| 3-4 years                                           | 38 (7%)           | 552 | 7 (16%)           | 44  |               | 43 (9%)           | 492 | 3 (11%)           | 27  |         |                  |

Abbreviation: RP=Radical Prostatectomy, RT=Radiotherapy, AM->RP and AM->RT refer to those who commenced with active monitoring for at least one year before switching to radical prostatectomy or radiotherapy, respectively. <sup>a</sup>P value from a likelihood ratio test comparing a mixed effects model, with and without treatment received (RP vs. AM->RP) as a covariate. Other covariates included a treatment cohort indicator (randomised/preference) and propensity scores. Baseline measures were not included, or adjusted for, based on this being an 'as treated' analysis. <sup>b</sup>P value from a likelihood ratio test comparing a mixed effects model, with and without treatment received (RT vs. AM->RT) as a covariate. Other covariates included the baseline measure of the symptom, a treatment cohort indicator (randomised/preference) and propensity scores.

**Table S8. Adjusted interaction between treatment and age group on symptoms corresponding to Figure S4**

| Assessment period                                 | AM (<65)          |     | AM (≥65)          |     | RP (<65)          |     | RP (≥65)          |     | RT (<65)          |     | RT (≥65)          |     | P values             |                       |
|---------------------------------------------------|-------------------|-----|-------------------|-----|-------------------|-----|-------------------|-----|-------------------|-----|-------------------|-----|----------------------|-----------------------|
|                                                   | n (%) / Mean (SD) | N   | n (%) / Mean (SD) | N   | n (%) / Mean (SD) | N   | n (%) / Mean (SD) | N   | n (%) / Mean (SD) | N   | n (%) / Mean (SD) | N   | Overall <sup>a</sup> | Pairwise <sup>b</sup> |
| <b>EPIC: ≥1 Pad per day</b>                       |                   |     |                   |     |                   |     |                   |     |                   |     |                   |     | <b>P=0.474</b>       |                       |
| Baseline                                          | 0 (0%)            | 318 | 0 (0%)            | 202 | 2 (1%)            | 251 | 1 (1%)            | 111 | 0 (0%)            | 164 | 0 (0%)            | 113 |                      |                       |
| 0-1 years                                         | 2 (0%)            | 459 | 1 (0%)            | 297 | 120 (33%)         | 361 | 77 (42%)          | 185 | 1 (0%)            | 266 | 6 (3%)            | 176 |                      |                       |
| 1-2 years                                         | 2 (1%)            | 389 | 2 (1%)            | 271 | 71 (21%)          | 342 | 52 (30%)          | 175 | 1 (0%)            | 251 | 6 (4%)            | 163 |                      |                       |
| 2-3 years                                         | 2 (0%)            | 413 | 1 (0%)            | 278 | 69 (20%)          | 353 | 57 (30%)          | 189 | 1 (0%)            | 281 | 8 (4%)            | 185 |                      |                       |
| 3-4 years                                         | 2 (1%)            | 388 | 2 (1%)            | 267 | 57 (16%)          | 357 | 45 (25%)          | 178 | 3 (1%)            | 294 | 5 (3%)            | 184 |                      |                       |
| 4-5 years                                         | 4 (1%)            | 392 | 1 (0%)            | 254 | 64 (18%)          | 361 | 45 (27%)          | 168 | 2 (1%)            | 299 | 4 (2%)            | 186 |                      |                       |
| 5-6 years                                         | 3 (1%)            | 352 | 5 (2%)            | 243 | 59 (17%)          | 344 | 42 (26%)          | 161 | 3 (1%)            | 301 | 4 (2%)            | 174 |                      |                       |
| <b>ICS male: Nocturia (&gt;1 times per night)</b> |                   |     |                   |     |                   |     |                   |     |                   |     |                   |     | <b>P=0.016</b>       |                       |
| Baseline                                          | 82 (15%)          | 547 | 101 (29%)         | 347 | 83 (19%)          | 430 | 64 (32%)          | 201 | 56 (18%)          | 320 | 48 (26%)          | 187 |                      |                       |
| 0-1 years                                         | 111 (18%)         | 611 | 112 (29%)         | 387 | 102 (22%)         | 457 | 86 (38%)          | 228 | 144 (41%)         | 349 | 95 (44%)          | 215 |                      | RP vs. AM             |
| 1-2 years                                         | 108 (21%)         | 505 | 111 (33%)         | 339 | 66 (17%)          | 393 | 60 (30%)          | 197 | 81 (27%)          | 303 | 75 (41%)          | 185 |                      | P=0.612               |
| 2-3 years                                         | 102 (21%)         | 478 | 119 (38%)         | 312 | 72 (19%)          | 378 | 59 (30%)          | 195 | 90 (30%)          | 305 | 71 (36%)          | 195 |                      | RT vs. AM             |
| 3-4 years                                         | 116 (27%)         | 432 | 108 (38%)         | 283 | 68 (18%)          | 369 | 55 (29%)          | 187 | 98 (32%)          | 307 | 64 (34%)          | 190 |                      | P=0.003               |
| 4-5 years                                         | 115 (28%)         | 413 | 115 (44%)         | 259 | 75 (20%)          | 366 | 46 (27%)          | 172 | 102 (34%)         | 297 | 64 (35%)          | 185 |                      | RP vs. RT             |
| 5-6 years                                         | 119 (33%)         | 357 | 108 (44%)         | 244 | 64 (18%)          | 352 | 50 (29%)          | 173 | 101 (33%)         | 302 | 70 (40%)          | 177 |                      | P=0.019               |
| <b>EPIC: Men reporting lack of firmness</b>       |                   |     |                   |     |                   |     |                   |     |                   |     |                   |     | <b>P=0.198</b>       |                       |
| Baseline                                          | 37 (12%)          | 308 | 33 (17%)          | 193 | 35 (14%)          | 242 | 26 (23%)          | 111 | 22 (13%)          | 163 | 33 (29%)          | 114 |                      |                       |
| 0-1 years                                         | 81 (18%)          | 448 | 62 (22%)          | 277 | 257 (72%)         | 356 | 121 (66%)         | 184 | 106 (41%)         | 257 | 80 (48%)          | 165 |                      |                       |
| 1-2 years                                         | 64 (17%)          | 380 | 59 (23%)          | 258 | 207 (62%)         | 333 | 103 (60%)         | 171 | 80 (33%)          | 242 | 69 (45%)          | 154 |                      |                       |
| 2-3 years                                         | 83 (21%)          | 398 | 60 (23%)          | 261 | 173 (50%)         | 344 | 101 (55%)         | 184 | 91 (34%)          | 268 | 93 (52%)          | 180 |                      |                       |
| 3-4 years                                         | 84 (22%)          | 389 | 63 (25%)          | 250 | 180 (51%)         | 351 | 104 (57%)         | 181 | 92 (33%)          | 283 | 84 (47%)          | 177 |                      |                       |
| 4-5 years                                         | 82 (21%)          | 385 | 70 (29%)          | 243 | 169 (47%)         | 360 | 90 (55%)          | 163 | 97 (33%)          | 292 | 89 (50%)          | 178 |                      |                       |
| 5-6 years                                         | 82 (24%)          | 345 | 64 (28%)          | 227 | 165 (48%)         | 345 | 87 (53%)          | 164 | 101 (34%)         | 293 | 80 (48%)          | 166 |                      |                       |
| <b>EPIC: Bloody stools</b>                        |                   |     |                   |     |                   |     |                   |     |                   |     |                   |     | <b>P=0.340</b>       |                       |
| Baseline                                          | 5 (2%)            | 316 | 2 (1%)            | 200 | 3 (1%)            | 251 | 1 (1%)            | 113 | 4 (2%)            | 166 | 0 (0%)            | 113 |                      |                       |
| 0-1 years                                         | 8 (2%)            | 460 | 4 (1%)            | 298 | 2 (1%)            | 362 | 1 (1%)            | 188 | 10 (4%)           | 269 | 5 (3%)            | 177 |                      |                       |
| 1-2 years                                         | 3 (1%)            | 385 | 1 (0%)            | 273 | 3 (1%)            | 342 | 0 (0%)            | 177 | 13 (5%)           | 251 | 16 (10%)          | 163 |                      |                       |
| 2-3 years                                         | 5 (1%)            | 413 | 0 (0%)            | 274 | 5 (1%)            | 352 | 0 (0%)            | 191 | 23 (8%)           | 281 | 17 (9%)           | 185 |                      |                       |
| 3-4 years                                         | 1 (0%)            | 393 | 0 (0%)            | 266 | 2 (1%)            | 356 | 0 (0%)            | 183 | 25 (9%)           | 293 | 16 (9%)           | 185 |                      |                       |
| 4-5 years                                         | 3 (1%)            | 395 | 0 (0%)            | 257 | 0 (0%)            | 367 | 1 (1%)            | 173 | 23 (8%)           | 297 | 17 (9%)           | 185 |                      |                       |
| 5-6 years                                         | 1 (0%)            | 355 | 1 (0%)            | 242 | 4 (1%)            | 354 | 1 (1%)            | 172 | 20 (7%)           | 301 | 10 (6%)           | 176 |                      |                       |

Abbreviation: AM=active monitoring, RP=radical prostatectomy, RT=radiotherapy only, <sup>a</sup>Overall p value for the likelihood ratio test of inclusion/exclusion of an interaction term between age (continuous) and treatment group, <sup>b</sup>Where there was evidence of an interaction, pairwise comparisons were carried out to see where treatment effect was modified by age group



**Table S9. Adjusted symptoms and quality five years after enrolment in the CEASAR cohort or diagnosis in the ProtecT trial**

| EPIC score/item                            | ProtecT (all)*<br>Median (IQR) / %          | CEASAR (low risk)<br>Median (IQR) / % |
|--------------------------------------------|---------------------------------------------|---------------------------------------|
| <b>Active monitoring/surveillance (n)*</b> | 1135 (EPIC c.570)                           | 363                                   |
| <b>Urinary function</b>                    |                                             |                                       |
| Incontinence score                         | 100 (86, 100)                               | 92 (73, 100)                          |
| Leakage (%)                                | 1%                                          | 7%                                    |
| Irritative score                           | 96 (89, 100)                                | 88 (81, 100)                          |
| Frequency of problem (%)                   | 4%                                          | 15%                                   |
| <b>Sexual function</b>                     |                                             |                                       |
| Sexual function score                      | 50 (29, 67)                                 | 55 (22, 85)                           |
| Erection, lack of firmness                 | 50%                                         | 57%                                   |
| <b>Bowel function</b>                      |                                             |                                       |
| Bowel function score                       | 96 (89, 100)                                | 100 (92, 100)                         |
| Bloody stools                              | <1%                                         | 0%                                    |
| <b>Radical prostatectomy (n)</b>           | <b>Open</b><br>750 (EPIC c.520)             | <b>Robotic-Assisted</b><br>675        |
| <b>Urinary function</b>                    |                                             |                                       |
| Incontinence score                         | 86 (67, 94)                                 | 79 (58, 100)                          |
| Leakage (%)                                | 6%                                          | 10%                                   |
| Irritative score                           | 96 (93, 100)                                | 94 (88, 100)                          |
| Frequency of problem (%)                   | 6%                                          | 12%                                   |
| <b>Sexual function</b>                     |                                             |                                       |
| Sexual function score                      | 31 (9, 53)                                  | 48 (15, 80)                           |
| Erection, lack of firmness                 | 71%                                         | 61%                                   |
| <b>Bowel function</b>                      |                                             |                                       |
| Bowel function score                       | 93 (86, 96)                                 | 100 (96, 100)                         |
| Bloody stools                              | <1%                                         | 0%                                    |
| <b>Radiotherapy (n)</b>                    | <b>EBRT<sup>1</sup></b><br>603 (EPIC c.480) | <b>IMRT<sup>2</sup></b><br>261        |
| <b>Urinary function</b>                    |                                             |                                       |
| Incontinence score                         | 100 (86, 100)                               | 100 (79, 100)                         |
| Leakage (%)                                | 1%                                          | 6%                                    |
| Irritative score                           | 96 (89, 100)                                | 94 (81, 100)                          |
| Frequency of problem (%)                   | 4%                                          | 13%                                   |
| <b>Sexual function</b>                     |                                             |                                       |
| Sexual function score                      | 31 (9, 53)                                  | 28 (9, 69)                            |
| Erection, lack of firmness                 | 71%                                         | 74%                                   |
| <b>Bowel function</b>                      |                                             |                                       |
| Bowel function score                       | 93 (86, 96)                                 | 96 (88, 100)                          |
| Bloody stools                              | 8%                                          | 0%                                    |
| <b>Low-dose-rate brachytherapy (n)</b>     | 77 (EPIC c. 60)                             | 87                                    |
| <b>Urinary function</b>                    |                                             |                                       |
| Incontinence score                         | 97 (79, 100)                                | 100 (81, 100)                         |
| Leakage (%)                                | 5%                                          | 5%                                    |
| Irritative score                           | 93 (88, 100)                                | 94 (84, 100)                          |
| Frequency of problem (%)                   | 7%                                          | 14%                                   |
| <b>Sexual function</b>                     |                                             |                                       |
| Sexual function score                      | 42 (21, 64)                                 | 53 (24, 78)                           |
| Erection, lack of firmness                 | 58%                                         | 61%                                   |
| <b>Bowel function</b>                      |                                             |                                       |
| Bowel function score                       | 96 (89, 100)                                | 100 (88, 100)                         |
| Bloody stools                              | 3%                                          | 0%                                    |

ProtecT used EPIC-50, CEASAR used EPIC-26, <sup>1</sup>External Beam Radiotherapy, <sup>2</sup>IMRT; Intensity modulated radiation therapy low risk group patients, \*ProtecT adjusted results censored at second treatment, unlike CEASAR unadjusted results in Table e5 (numbers of men unavailable for binary items).  
[<https://jamanetwork.com/journals/jama/fullarticle/2758599>]
